# Supplementary material for: Ultrasensitive surface-enhanced Raman scattering nanosensor for mercury ion detection based on functionalized silver nanoparticles
Source: Royal Society of Chemistry journal article supplement (doi:10.1039/c3ra47492e), 2014-01-01
Supplement: c3ra47492e1.pdf [file c3ra47492e1.pdf]

## *Supporting Information for*

### **Ultrasensitive surface-enhanced Raman scattering nanosensor for mercury ion detection based on functionalized silver nanoparticles**

Lingxin Chen<sup>\*a</sup>, Nan Qi,<sup>ab</sup> Xiaokun Wang<sup>ac</sup>, Ling Chen<sup>ad</sup>, Huiyan You<sup>\*b</sup>, Jinhua Li<sup>a</sup>

<sup>a</sup> Key Laboratory of Coastal Environmental Processes and Ecological Remediation, Shandong  
Provincial Key Laboratory of Coastal Environmental Processes, Yantai Institute of Coastal Zone  
Research, Chinese Academy of Sciences, Yantai 264003, China

<sup>b</sup> Environmental and Chemical Engineering College, Dalian University, Dalian 116600, China

<sup>c</sup> College of Chemistry and Chemical Engineering, Qufu Normal University, Qufu 273165, China

<sup>d</sup> University of Chinese Academy of Sciences, Beijing 100049, China

<sup>\*</sup> Correspondence author.

Prof. L. Chen; Tel.: +86 535 2109130; Fax: +86 535 2109130.

E-mail: lxchen@yic.ac.cn.

Prof. H. You; Tel.: +86 411 87402440; Fax: +86 411 87402436.

E-mail: dlyhy@dicp.ac.cn

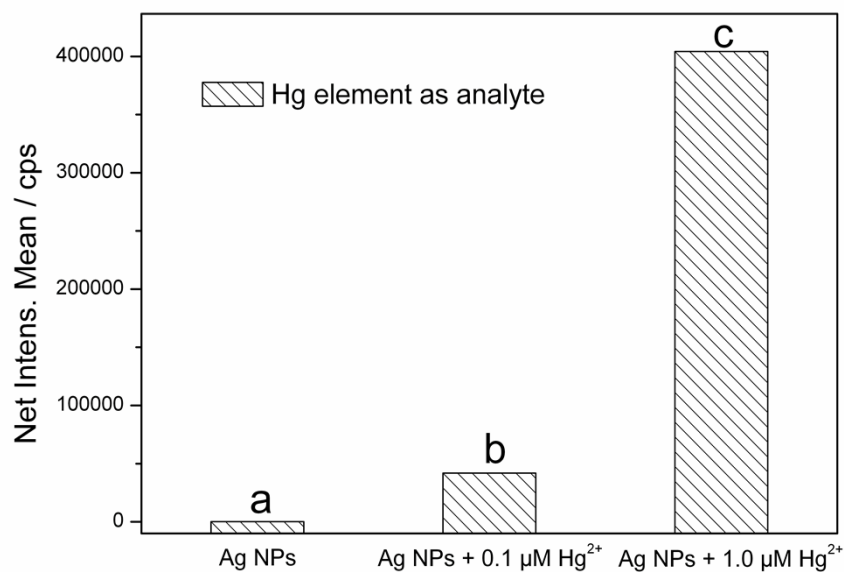

**Fig. S1.** The ICP-MS intensities of Hg in the precipitates obtained from the solution of Ag NPs functionalized with 4-MPY (a), after addition of 0.1  $\mu\text{M}$   $\text{Hg}^{2+}$  (b), 1.0  $\mu\text{M}$   $\text{Hg}^{2+}$  (c) to a solution of 4-MPY–AgNPs-based sensing system. The precipitates were obtained by five cycles of centrifugation of the resulting solution.

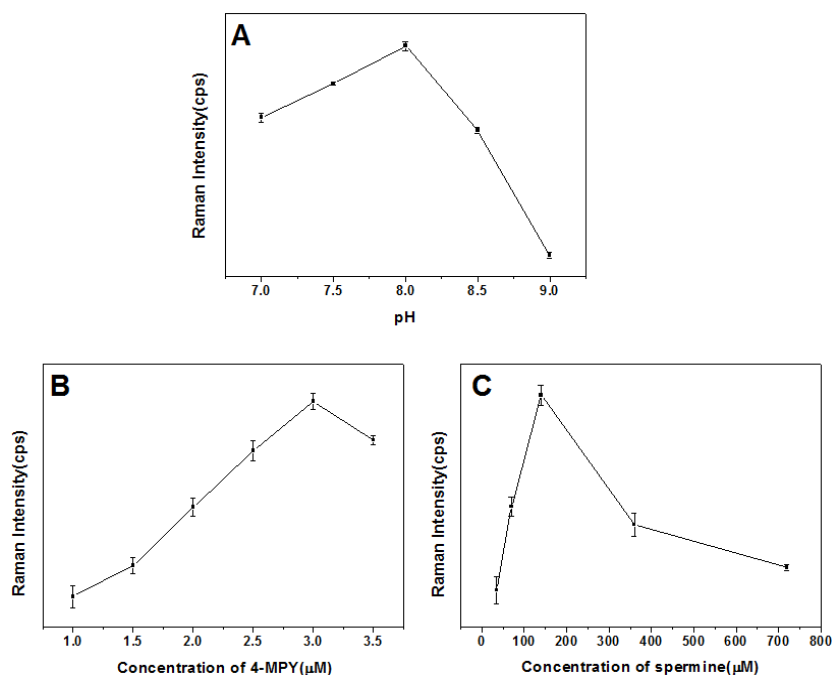

**Fig. S2.** Effect of (A) the pH value of a Tris-HCl buffer solution (from 7.0 to 9.0), (B) the concentration of 4-MPY (from 1.0 to 3.5  $\mu\text{M}$ ), and (C) the concentration of spermine (from 35 to 720  $\mu\text{M}$ ) of the sensing system on the Raman signal intensity. The error bars represent the standard deviations based on three independent measurements.
